# Supplementary material for: Data Partitions, Bayesian Analysis and Phylogeny of the Zygomycetous Fungal Family Mortierellaceae, Inferred from Nuclear Ribosomal DNA Sequences
Source: PubMed Central journal article supplement (PMC3213126; doi:10.1371/journal.pone.0027507), 2011-11-10

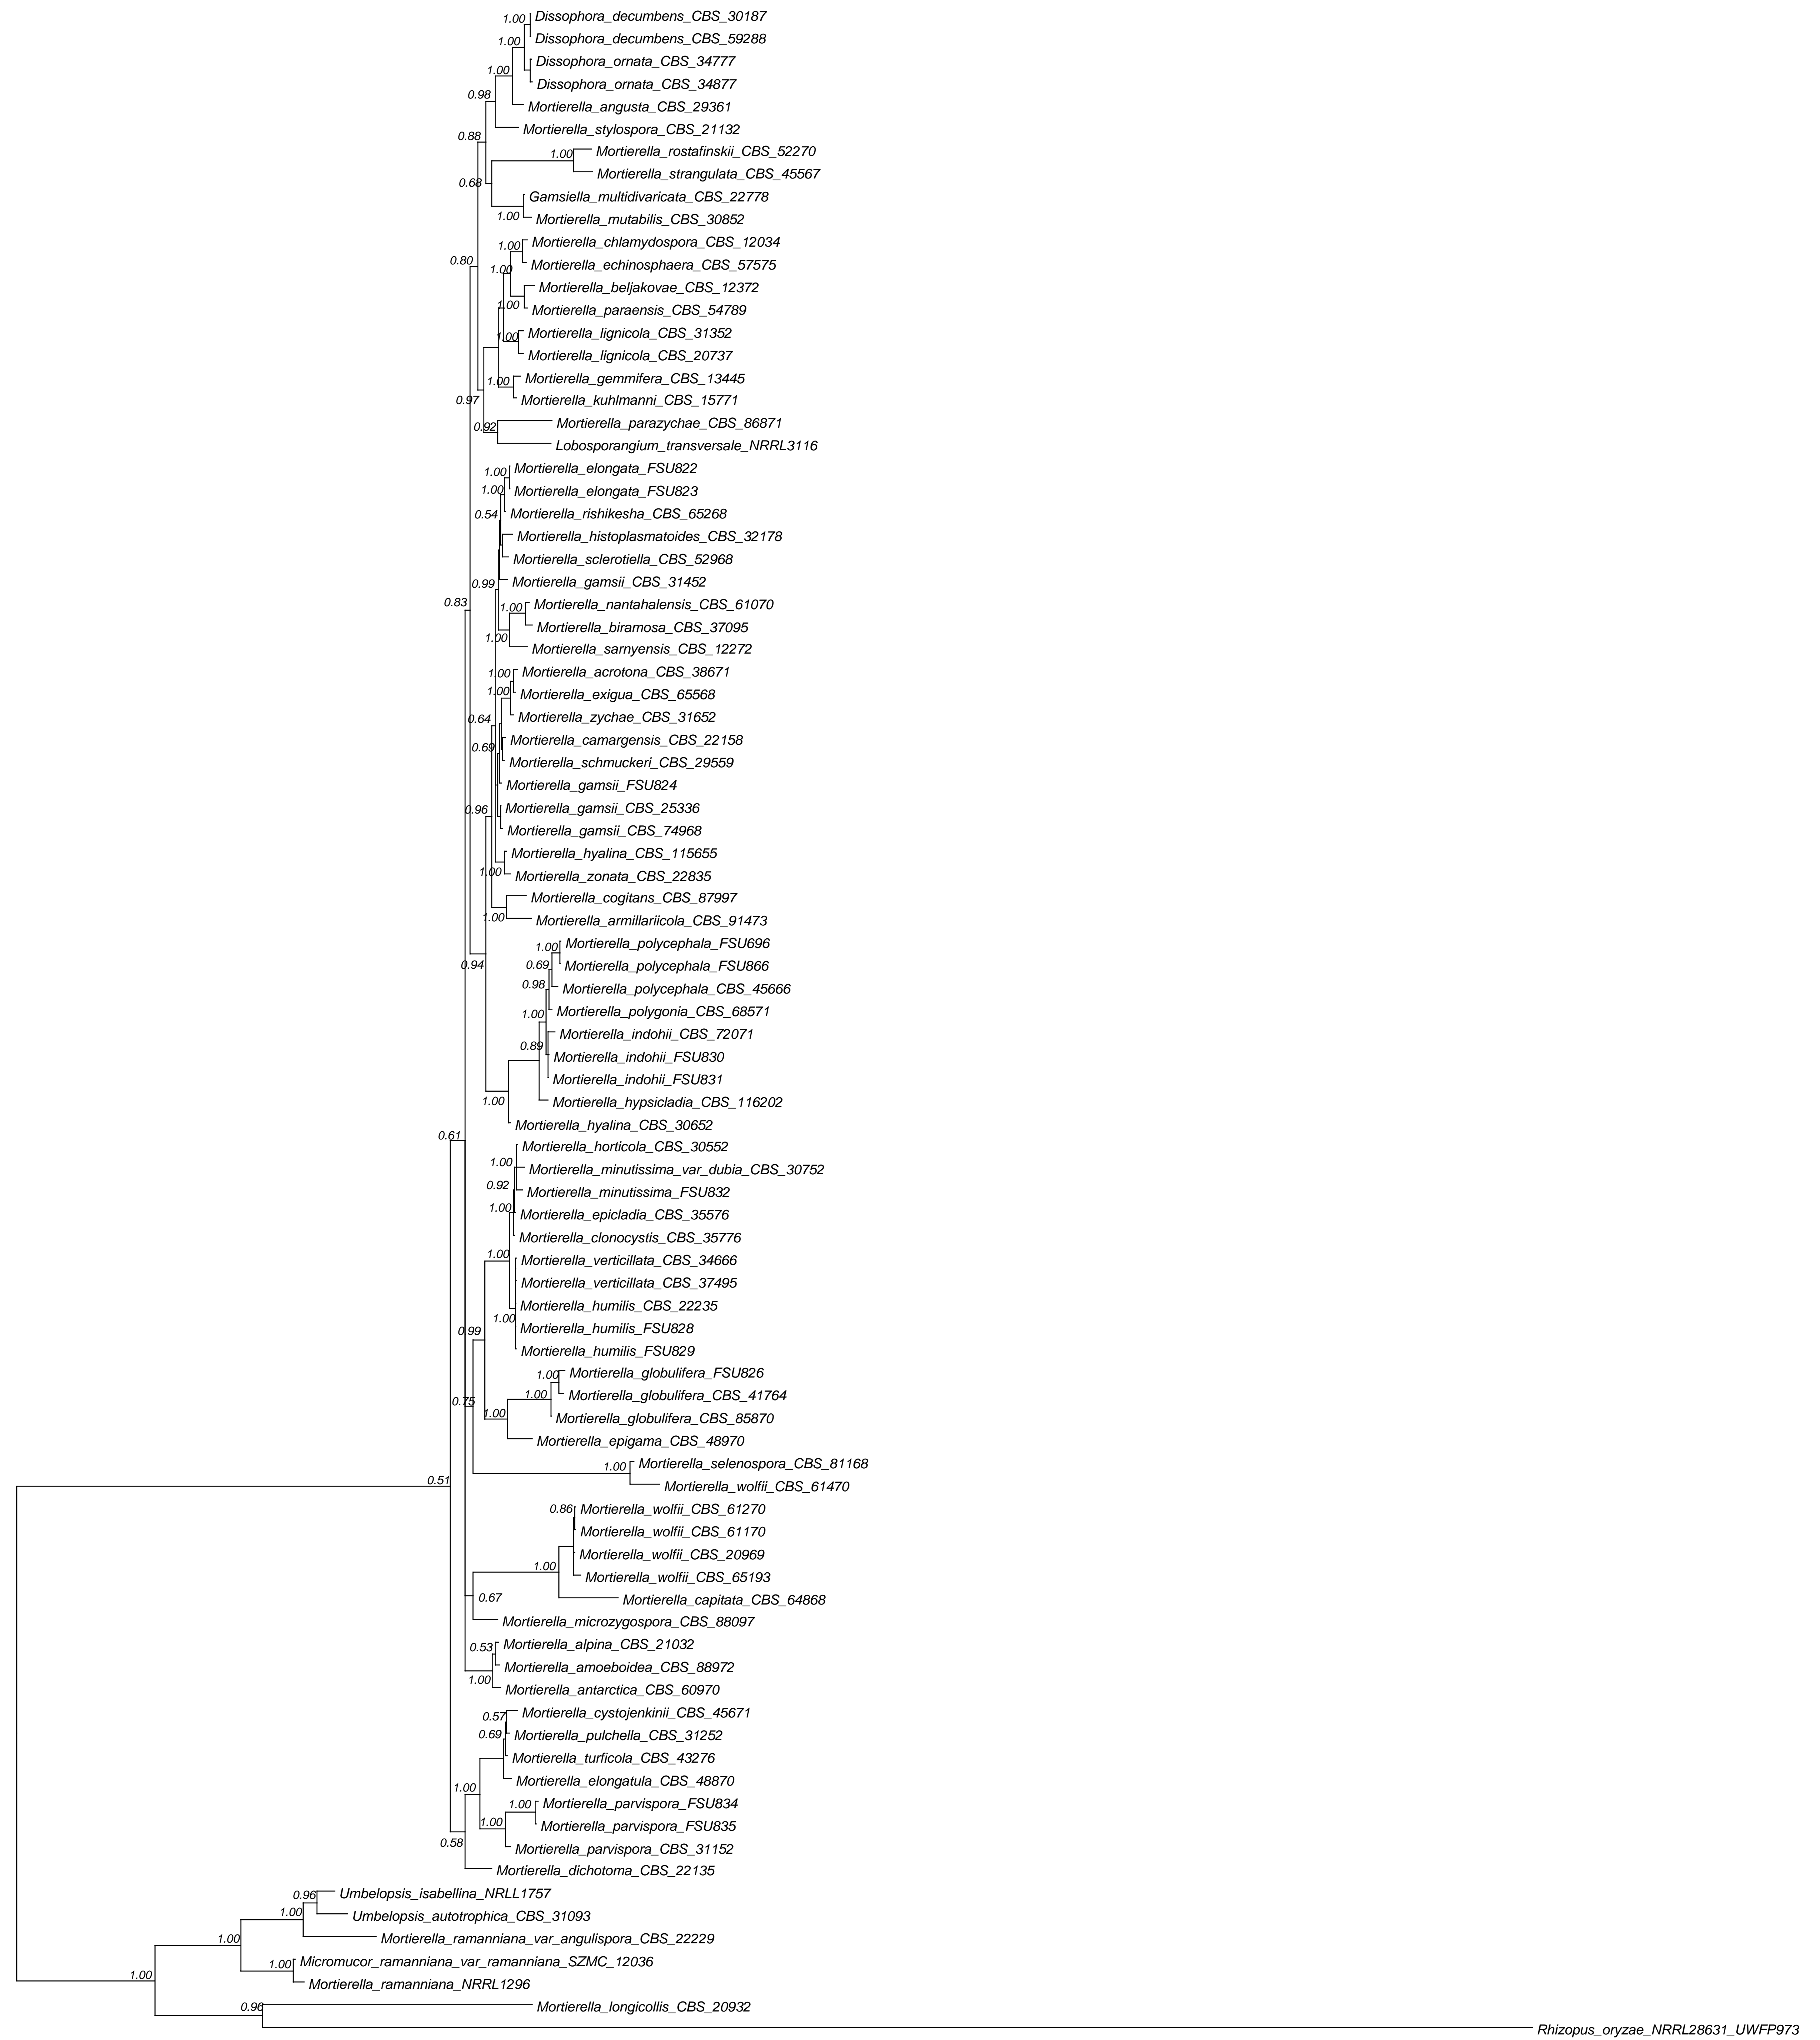

Supplement: pone.0027507.s001.pdf [file pone.0027507.s001.pdf]
