# Supplementary material for: Data Partitions, Bayesian Analysis and Phylogeny of the Zygomycetous Fungal Family Mortierellaceae, Inferred from Nuclear Ribosomal DNA Sequences
Source: PubMed Central journal article supplement (PMC3213126; doi:10.1371/journal.pone.0027507), 2011-11-10
Supplement: pone.0027507.s005.pdf [file pone.0027507.s005.pdf]

**Table S1.** Fungal strains included in this study, their collection numbers and type status, and the accession numbers of the sequences deposited in GenBank.

| Taxon name                                                         | Strain number <sup>a</sup> | Status <sup>b</sup>                               | GenBank accession no. |          |          |
|--------------------------------------------------------------------|----------------------------|---------------------------------------------------|-----------------------|----------|----------|
|                                                                    |                            |                                                   | SSU                   | ITS      | LSU      |
| <i>Dissophora decumbens</i> Thaxt.                                 | CBS 301.87                 | –                                                 | HQ667439              | HQ630275 | HQ667354 |
| <i>D. decumbens</i>                                                | CBS 592.88                 | –                                                 | HQ667440              | HQ630276 | HQ667355 |
| <i>D. ornata</i> W. Gams                                           | CBS 347.77                 | <i>M. ornata</i> holotype                         | HQ667441              | HQ630277 | HQ667356 |
| <i>D. ornata</i>                                                   | CBS 348.77                 | <i>M. ornata</i> holotype                         | HQ667442              | HQ630278 | HQ667357 |
| <i>Gamsiella multidivariata</i> Benny & M. Blackw.                 | CBS 227.78                 | <i>M. multidivariata</i> isotype                  | HQ667475              | HQ630314 | HQ667391 |
| <i>Lobosporangium transversale</i> M. Blackw. & Benny              | NRRL3116                   | –                                                 | HQ667488              | –        | HQ667404 |
| <i>Micromucor ramannianus</i> var. <i>ramannianus</i> (Möller) Arx | SZMC 12036                 | –                                                 | HQ667452              | HQ630288 | –        |
| <i>Mi. ramannianus</i>                                             | NRRL1296                   | –                                                 | –                     | HQ630289 | HQ667366 |
| <i>Mortierella acrotona</i> W. Gams                                | CBS 386.71                 | type                                              | HQ667489              | HQ630328 | HQ667405 |
| <i>M. alpina</i> Peyronel                                          | CBS 210.32                 | <i>M. renispora</i> authentic                     | HQ667501              | HQ630345 | HQ667421 |
| <i>M. amoeboides</i> W. Gams                                       | CBS 889.72                 | type                                              | HQ667502              | HQ630346 | HQ667422 |
| <i>M. angusta</i> Linnem.                                          | CBS 293.61                 | <i>M. polycephala</i> var. <i>angusta</i> neotype | HQ667443              | HQ630279 | HQ667358 |
| <i>M. antarctica</i> Linnem.                                       | CBS 609.70                 | type                                              | HQ667503              | HQ630347 | HQ667423 |
| <i>M. armillariicola</i> W. Gams                                   | CBS 914.73                 | type                                              | HQ667446              | HQ630282 | HQ667361 |
| <i>M. beljakovae</i> Milko                                         | CBS 123.72                 | type                                              | –                     | HQ630352 | HQ667428 |
| <i>M. biramosa</i> Tiegh.                                          | CBS 370.95                 | <i>M. wuyishanensis</i> type                      | HQ667473              | HQ630312 | HQ667389 |
| <i>M. camargensis</i> W. Gams & R. Moreau                          | CBS 221.58                 | type                                              | HQ667492              | HQ630331 | HQ667408 |
| <i>M. capitata</i> Marchal                                         | CBS 648.68                 | <i>M. vesiculosa</i> type                         | –                     | HQ847055 | HQ667418 |
| <i>M. chlamydozpora</i> (Chesters) Plaäts–Nit.                     | CBS 120.34                 | <i>Azygozgyum chlamydosporum</i> syntype          | HQ667508              | HQ630354 | HQ667430 |
| <i>M. clonocystis</i> W. Gams                                      | CBS 357.76                 | type                                              | HQ667479              | HQ630318 | HQ667395 |
| <i>M. cogitans</i> Degawa                                          | CBS 879.97                 | type                                              | HQ667445              | HQ630281 | HQ667360 |
| <i>M. cystojenkini</i> W. Gams & Veenb.–Rijks                      | CBS 456.71                 | type                                              | HQ667504              | HQ630348 | HQ667424 |
| <i>M. dichotoma</i> Linnem.                                        | CBS 221.35                 | syntype                                           | HQ667477              | HQ630316 | HQ667393 |
| <i>M. echinosphaera</i> Plaäts–Nit.                                | CBS 575.75                 | holotype                                          | –                     | GU559985 | HQ667431 |
| <i>M. elongata</i> Linnem.                                         | FSU 822                    | –                                                 | HQ667494              | HQ630336 | HQ667412 |
| <i>M. elongata</i>                                                 | FSU 823                    | –                                                 | HQ667495              | HQ630337 | HQ667413 |
| <i>M. elongatula</i> W. Gams & Domsch                              | CBS 488.70                 | type                                              | HQ667505              | HQ630349 | HQ667425 |
| <i>M. epicladia</i> W. Gams & Emden                                | CBS 355.76                 | type                                              | HQ667480              | HQ630319 | HQ667396 |
| <i>M. epigama</i> W. Gams & Domsch                                 | CBS 489.70                 | type                                              | HQ667453              | HQ630290 | HQ667367 |
| <i>M. exigua</i> Linnem.                                           | CBS 655.68                 | type                                              | HQ667490              | HQ630329 | HQ667406 |
| <i>M. gamsii</i> Milko                                             | CBS 253.36                 | <i>M. spinosa</i> syntype                         | HQ667497              | HQ630339 | HQ667415 |
| <i>M. gamsii</i>                                                   | FSU 824                    | –                                                 | HQ667498              | HQ630341 | HQ667417 |
| <i>M. gamsii</i>                                                   | CBS 749.68                 | type                                              | –                     | HQ630340 | HQ667416 |
| <i>M. cf. gamsii</i> Milko                                         | CBS 314.52                 | <i>M. spinosa</i> syntype                         | HQ667468              | HQ630307 | HQ667384 |
| <i>M. gemmifera</i> M. Ellis                                       | CBS 134.45                 | type                                              | HQ667456              | HQ630293 | HQ667371 |
| <i>M. globulifera</i> O. Rostr                                     | CBS 417.64                 | <i>M. ericetorum</i> type                         | –                     | HQ847056 | HQ667370 |
| <i>M. globulifera</i>                                              | CBS 858.70                 | neotype                                           | HQ667454              | HQ630291 | HQ667368 |
| <i>M. globulifera</i>                                              | FSU 826                    | –                                                 | HQ667455              | HQ630292 | HQ667369 |
| <i>M. histoplasmatoides</i> W. Gams                                | CBS 321.78                 | type                                              | HQ667470              | HQ630309 | HQ667386 |
| <i>M. horticola</i> Linnem.                                        | CBS 305.52                 | syntype                                           | HQ667483              | HQ630322 | HQ667399 |
| <i>M. humilis</i> Linnem.                                          | CBS 222.35                 | syntype                                           | HQ667485              | HQ630325 | HQ667401 |
| <i>M. humilis</i>                                                  | FSU 828                    | –                                                 | HQ667486              | HQ630326 | HQ667402 |
| <i>M. humilis</i>                                                  | CBS 745.68                 | –                                                 | HQ667487              | HQ630327 | HQ667403 |
| <i>M. hyalina</i> (Harz) W. Gams                                   | CBS 306.52                 | <i>M. hygrophila</i> var. <i>minuta</i> syntype   | HQ667460              | HQ630297 | HQ667376 |
| <i>M. cf. hyalina</i> (Harz) W. Gams                               | CBS 115655                 | <i>Hydrophora hyalina</i> isotype                 | HQ667509              | HQ630355 | HQ667432 |
| <i>M. hypsycladia</i> Degawa & W. Gams                             | CBS 116202                 | type                                              | –                     | HQ630302 | HQ667379 |
| <i>M. indohii</i> C.Y. Chien                                       | FSU 830                    | –                                                 | EU736291              | HQ630299 | EU736318 |
| <i>M. indohii</i>                                                  | FSU 831                    | –                                                 | HQ667462              | HQ630300 | HQ667438 |
| <i>M. indohii</i>                                                  | CBS 720.71                 | isotype                                           | HQ667461              | HQ630298 | HQ667377 |

|                                                               |             |                                                             |          |          |          |
|---------------------------------------------------------------|-------------|-------------------------------------------------------------|----------|----------|----------|
| <i>M. kuhlmanni</i> W. Gams                                   | CBS 157.71  | type                                                        | HQ667457 | HQ630294 | HQ667372 |
| <i>M. lignicola</i> (G.W. Martin) W. Gams & R. Moreau         | CBS 207.37  | <i>Haplosporangium lignicola</i> type                       | HQ667511 | HQ630357 | HQ667435 |
| <i>M. lignicola</i>                                           | CBS 313.52  | <i>M. sepedonioides</i> type                                | HQ667510 | –        | HQ667434 |
| <i>M. longicollis</i> Dixon–Stew.                             | CBS 209.32  | authentic                                                   | HQ667451 | HQ630287 | HQ667365 |
| <i>M. microzygospora</i> Degawa                               | CBS 880.97  | type                                                        | HQ667478 | HQ630317 | HQ667394 |
| <i>M. minutissima</i> Tiegh.                                  | FSU 832     | –                                                           | EU736292 | HQ630324 | EU736319 |
| <i>M. minutissima</i> var. <i>dubia</i> Linnem.               | CBS 307.52  | syntype                                                     | HQ667484 | HQ630323 | HQ667400 |
| <i>M. mutabilis</i> Linnem.                                   | CBS 308.52  | syntype                                                     | HQ667476 | HQ630315 | HQ667392 |
| <i>M. nantahalensis</i> C.Y. Chien                            | CBS 610.70  | type                                                        | HQ667472 | HQ630311 | HQ667388 |
| <i>M. paraensis</i> Pfenning & W. Gams                        | CBS 547.89  | type                                                        | –        | HQ630353 | HQ667429 |
| <i>M. parazychnae</i> W. Gams                                 | CBS 868.71  | type                                                        | HQ667447 | HQ630283 | HQ667362 |
| <i>M. parvispora</i> Linnem.                                  | CBS 311.52  | syntype                                                     | HQ667458 | EU484279 | HQ667373 |
| <i>M. parvispora</i>                                          | FSU 834     | –                                                           | HQ667459 | HQ630295 | HQ667374 |
| <i>M. parvispora</i>                                          | FSU 835     | –                                                           | –        | HQ630296 | HQ667375 |
| <i>M. polycephala</i> Coem.                                   | CBS 456.66  | –                                                           | –        | HQ630335 | HQ667411 |
| <i>M. polycephala</i>                                         | FSU 696     | –                                                           | HQ667493 | HQ630332 | HQ667409 |
| <i>M. polycephala</i>                                         | FSU 866     | –                                                           | –        | HQ630333 | HQ667410 |
| <i>Mortierella polygonia</i> W. Gams & Veenb. Rijks           | –CBS 685.71 | type                                                        | HQ667463 | HQ630301 | HQ667378 |
| <i>M. pulchella</i> Linnem.                                   | CBS 312.52  | authentic                                                   | HQ667507 | HQ630351 | HQ667427 |
| <i>M. ramanniana</i> var. <i>angulispora</i> (Naumov) Linnem. | CBS 222.29  | neotype                                                     | HQ667450 | HQ630286 | HQ667364 |
| <i>M. rishiksha</i> B.S. Mehrotra & B.R. Mehrotra             | CBS 652.68  | type                                                        | HQ667469 | HQ630308 | HQ667385 |
| <i>M. rostafinskii</i> Bref.                                  | CBS 522.70  | neotype                                                     | HQ667512 | HQ630358 | HQ667436 |
| <i>M. sarnyensis</i> Milko                                    | CBS 122.72  | type                                                        | HQ667474 | HQ630313 | HQ667390 |
| <i>M. schmuckeri</i> Linnem.                                  | CBS 295.59  | syntype                                                     | HQ667496 | HQ630338 | HQ667414 |
| <i>M. sclerotiella</i> Milko                                  | CBS 529.68  | type                                                        | HQ667471 | HQ630310 | HQ667387 |
| <i>M. selenospora</i> W. Gams                                 | CBS 811.68  | type                                                        | HQ667499 | HQ630343 | HQ667419 |
| <i>M. strangulata</i> Tiegh                                   | CBS 455.67  | neotype                                                     | HQ667513 | HQ630359 | HQ667437 |
| <i>M. stylospora</i> Dixon–Stew.                              | CBS 211.32  | type                                                        | HQ667444 | HQ630280 | HQ667359 |
| <i>M. turficola</i> Y. Ling                                   | CBS 432.76  | neotype                                                     | HQ667506 | HQ630350 | HQ667426 |
| <i>M. verticillata</i> Linnem.                                | CBS 346.66  | <i>M. marburgensis</i> syntype                              | HQ667481 | HQ630320 | HQ667397 |
| <i>M. verticillata</i>                                        | CBS 374.95  | <i>Haplosporangium attenuatissimum</i> type                 | HQ667482 | HQ630321 | HQ667398 |
| <i>M. wolfii</i> B.S. Mehrotra & Baijal                       | CBS 209.69  | –                                                           | HQ667464 | HQ630303 | HQ667380 |
| <i>M. wolfii</i>                                              | CBS 611.70  | –                                                           | HQ667467 | HQ630306 | HQ667383 |
| <i>M. wolfii</i>                                              | CBS 612.70  | –                                                           | HQ667465 | HQ630304 | HQ667381 |
| <i>M. wolfii</i>                                              | CBS 651.93  | –                                                           | HQ667466 | HQ630305 | HQ667382 |
| <i>Mortierella</i> cf. <i>wolfii</i>                          | CBS 614.70  | –                                                           | HQ667500 | HQ630344 | HQ667420 |
| <i>M. zonata</i> Linnem.                                      | CBS 228.35  | type                                                        | –        | HQ630356 | HQ667433 |
| <i>M. zychnae</i> Linnem.                                     | CBS 316.52  | type                                                        | HQ667491 | HQ630330 | HQ667407 |
| <i>Rhizopus oryzae</i> Went & Prins. Geerl.                   | NRRL28631   | –                                                           | AF113440 | –        | AY213626 |
| <i>Umbelopsis autotrophica</i> (E.H. Evans) W. Gams           | CBS 310.93  | <i>Mortierella ramanniana</i> var. <i>autotrophica</i> type | HQ667449 | HQ630285 | HQ667363 |
| <i>U. isabellina</i> (Oudem.) W. Gams                         | NRLL1757    | –                                                           | HQ667448 | HQ630284 | –        |

<sup>a</sup> Abbreviations: CBS, Centraalbureau voor Schimmelcultures, Utrecht, The Netherlands,

FSU, Fungal Reference Centre, Jena, Germany, NRRL, Agricultural Research Service Culture

Collection, Peoria, Illinois, U.S.A., SZMC, Szeged Microbial Collection, Hungary.

<sup>b</sup> The status of the strains is presented as to be found in Mycobank

(<http://www.mycobank.org/>).
